# Supplementary material
Source: Springer Nature journal article supplement (https://www.springermedizin.de/resource/supplementary/12985_2010_920_MOESM1_ESM.pdf/9608746)

**A**

Ad wt

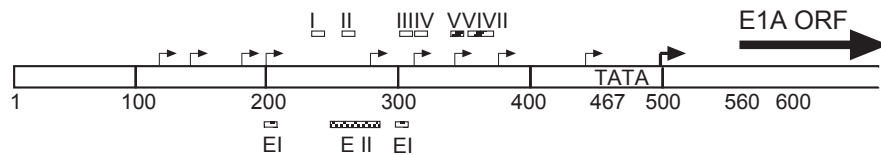**B**Ad $\Delta$ EP-TETP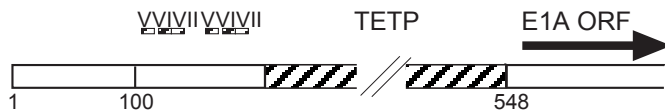**C**

AdCMV-eGFP

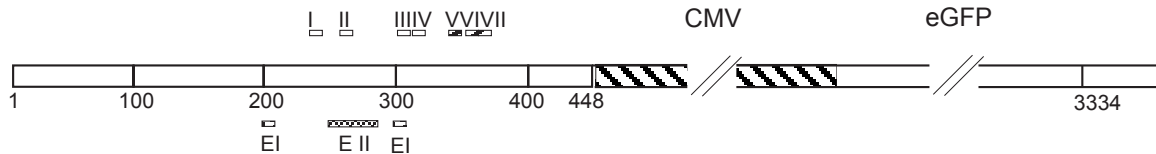**D**

AdTETP-CD40L/IL-2

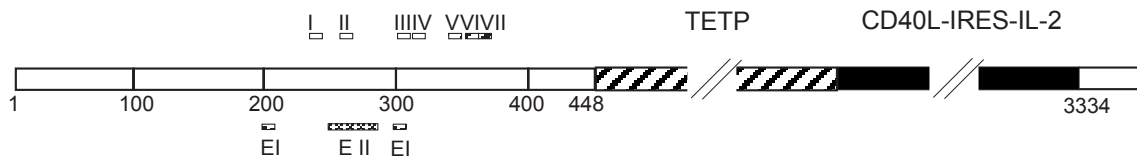

Supplement: MOESM1 [file 9608746]
